# Supplementary material for: Management of early- and late-onset sepsis: results from a survey in 80 German NICUs
Source: Springer Nature journal article supplement (doi:10.1007/s15010-018-1263-9), 2019-01-03
Supplement: MOESM1 [file 16373448]

| Contact data  Name, Surname  Academic title  Hospital  Department  Position  E-Mail | Contact data are stored in a protected database until final data analysis is completed |
| --- | --- |
| Type of Hospital | 🞎 University Hospital  🞎 Teaching hospitals cooperating with a University clinic  🞎 Reginal Neonatal Referral Center |
| Number of cots in the NICU |  |
| Number of admissions to the NICU in 2015 |  |
| Number of admissions to the NICU in 2015 with very low birth weight (< 1500g) |  |
| Which antibiotics do you recommend in your NICU as standard treatment for Early-onset sepsis in premature neonates?  Multiple choices allowed | 🞎 Ampicillin  🞎 Ampicillin-Sulbactam  🞎 Gentamicin  🞎 Cefotaxim  🞎 Piperacillin  🞎 Piperacillin-Tazobactam  🞎 other (please specify) |
| Which antibiotics do you recommend in your NICU as standard treatment for Late-onset sepsis in premature neonates?  Multiple choices allowed | 🞎 Ampicillin  🞎 Ampicillin-Sulbactam  🞎 Gentamicin  🞎 Cefotaxime  🞎 Ceftazidime  🞎 Piperacillin  🞎 Piperacillin-Tazobactam  🞎 Meropenem  🞎 Vancomycin oder Teicoplanin  🞎 other (please specify) |
| What is the standard for blood cultures in your NICU in case of Late-onset sepsis? | 🞎 Aerobic, 0,5ml  🞎 Aerobic 1ml  🞎 Aerobic und anaerobic (e.g. 1-2ml separated in 2 blood culture bottles) |
| What is (in your opinion) the role of anaerobic blood culturing in premature infants with Late-onset sepsis? | 🞎 Always necessary  🞎 Not necessary  🞎 Necessary only in special clinical situations, such as necrotizing enterocolitis |

| What is (in your opinion) the role of lumbar tap to exclude of confirm meningitis in a premature infant with blood culture positive Late-onset sepsis (Coagulase-negative staphylococci excluded)? | 🞎 Always necessary  🞎 Only in an infant with clinical signs of meningitis  🞎 Depending on the bacterial species detected in blood culture (e.g. *Serratia spp*.) |
| --- | --- |
| Do you perform a drug monitoring (trough level) in an infant receiving Gentamicin or any other aminoglycoside antibiotic?  If yes, which Gentamicin trough level is your target? | 🞎 Yes  🞎 No  🞎 The decision depends on the individual clinical situation (e.g. increased creatinine)  🞎 < 1 µg/mL 🞎 < 2 µg/mL |
| Do you perform a drug monitoring (trough level) in an infant receiving Vancomycin?  If yes, which Vancomycin trough level is your target? | 🞎 Yes  🞎 No  🞎 < 5 µg/ml 🞎 5 - 10 µg/ml  🞎 10 - 20 µg/ml |
| Does the previously known colonization of the infant (e.g. with MRSA or MRGN) influence your decision how to treat a Late-onset sepsis? | 🞎 Yes  🞎 No  🞎 other (please specify) |

| Item | Answer | Gentamicin empiric treatment for EOS | | Total | P-value |
| --- | --- | --- | --- | --- | --- |
|  |  | Yes | No | No. | Fisher‘s Exakt Test |
| Hospital type | University hospital | 17 | 10 | 27 | 0.046 |
|  | Regional neonatal referral center | 44 | 8 | 52 |  |
| Total |  | 61 | 18 | 79 |  |

EOS = early-onset sepsis

| Item | Answer | Tobramycin for empiric treatment of EOS | | Total | P-value |
| --- | --- | --- | --- | --- | --- |
|  |  | Yes | No | No. | Fisher‘s Exakt Test |
| Admission of VLBWI in 2015 | ≤ 30 | 2 | 4 | 6 | 0.018 |
|  | > 30 to 50 | 2 | 22 | 24 |  |
|  | ≥ 50 | 1 | 47 | 48 |  |
| Total |  | 5 | 73 | 78 |  |

EOS = early-onset sepsis

| Item | Answer | 3 rd generation cephalosporin in suspected LOS | | Total | P-value |
| --- | --- | --- | --- | --- | --- |
|  |  | Yes | No | No. | Fisher‘s Exakt Test |
| lumbar tap if proven LOS and positive blood culture | obligate | 16 | 7 | 23 | 0.013 |
|  | In cases of suspected meningitis | 18 | 32 | 50 |  |
|  | Only for specific detected pathogens | 1 | 3 | 4 |  |
| Total |  | 35 | 42 | 77 |  |
